# Supplementary material for: Medial Temporal Lobe Roles in Human Path Integration
Source: PubMed Central journal article supplement (PMC4011851; doi:10.1371/journal.pone.0096583), 2014-05-06
Supplement: pone.0096583.s004.pdf [file pone.0096583.s004.pdf]

**Table S3. Mean signed, unsigned (absolute), and variable errors of the three participant groups and results of statistical analyses for the whole-body rotation task based on untransformed data**

| Error type | <i>F</i> , <i>p</i> , and $\eta^2$ statistics <sup>b</sup> | Group means (and their standard errors) <sup>a</sup> |                   |                            |
|------------|------------------------------------------------------------|------------------------------------------------------|-------------------|----------------------------|
|            |                                                            | CONT <sup>c</sup>                                    | LTLR <sup>c</sup> | RTLRL <sup>c</sup>         |
| Signed     | $F_{(2,30)} = .29, p = .752,$<br>$\eta^2 = .02$            | 8.85 (6.56)                                          | 32.67 (25.58)     | 26.46 (32.68)              |
| Unsigned   | $F_{(2,30)} = .34, p = .715,$<br>$\eta^2 = .02$            | 34.44 (9.95)                                         | 55.89 (23.10)     | 57.59 (30.23)              |
| Variable   | $F_{(2,30)} = .23, p = .798,$<br>$\eta^2 = .01$            | 21.33 (7.99)                                         | 19.05 (6.05)      | 26.82 (99.64) <sup>d</sup> |

<sup>a</sup> Mean signed and unsigned errors are expressed as a percentage of the correct response values. Variable errors were computed by fitting a straight line through the raw responses, plotted as a function of the physically correct values, and then calculating the standard error of estimate as a measure of overall response precision.

<sup>b</sup> Statistics associated with the test of the main effect of group in each type of error.

<sup>c</sup> CONT = age-matched healthy control; LTLR = left temporal lobe resection; RTLRL = right temporal lobe resection.

<sup>d</sup> There was an outlier in the RTLRL group: one of the participants who exhibited possible response execution errors had a variable error of 113.07; the next highest variable error in this group was 27.01. When this participant was omitted, the group mean was 16.04 with a standard error of 22.82.
